# Supplementary material for: Historical Hot Spots of Dengue and Zika Viruses to Guide Targeted Vector Control in San Juan, Puerto Rico (2010–2022)
Source: PubMed Central journal article supplement (PMC10993837; doi:10.4269/ajtmh.23-0627), 2024-02-27
Supplement: tpmd230627.SD1.pdf [file tpmd230627.SD1.pdf]

Table S1: Multiple regression analysis of cases of DENV during 2015-2022 with previous cases of DENV 2010-2014 and with the spatial lags of DENV 2010-2013 in the Metro Area of San Juan, Puerto Rico.

| Variable                      | Coeff.  | Std. error | t-Statistic | Probability |
|-------------------------------|---------|------------|-------------|-------------|
| Constant                      | -0.0048 | 0.0199     | -0.2401     | 0.8103      |
| DENV 2010-2014                | 0.3353  | 0.0251     | 13.3747     | 0.0000      |
| DENV 2010-2014<br>spatial lag | 0.2922  | 0.0360     | 8.1212      | 0.0000      |

Adjusted R-squared: 0.236487

Table S2: Multiple regression analysis of cases of ZIKV in 2015-2017 with previous cases of DENV 2010-2014 and with the spatial lags of DENV 2010-2014 in the Metro Area of San Juan, Puerto Rico.

| Variable                      | Coeff.  | Std. error | t-Statistic | Probability |
|-------------------------------|---------|------------|-------------|-------------|
| Constant                      | -0.0052 | 0.0185     | -0.2800     | 0.7795      |
| DENV 2010-2014                | 0.4230  | 0.0233     | 18.1569     | 0.0000      |
| DENV 2010-2014<br>spatial lag | 0.3167  | 0.0334     | 9.4733      | 0.0000      |

Adjusted R-squared: 0.340889

Table S3: Multiple regression analysis of cases of DENV during 2015-2022 with previous cases of ZIKV 2015-2017 and with the spatial lags of ZIKV 2015-2017 in the Metro Area of San Juan, Puerto Rico.

| Variable                      | Coeff.  | Std. error | t-Statistic | Probability |
|-------------------------------|---------|------------|-------------|-------------|
| Constant                      | -0.0035 | 0.0209     | -0.1691     | 0.8658      |
| ZIKV 2015-2017                | 0.1947  | 0.0258     | 7.5379      | 0.0000      |
| ZIKV 2015-2017<br>spatial lag | 0.3715  | 0.0383     | 9.6953      | 0.0000      |

Adjusted R-squared: 0.157155
